# Supplementary material
Source: PubMed Central journal article supplement (PMC9730111)
Supplement: ajtr0014-7726-f8.pdf [file ajtr0014-7726-f8.pdf]

## Osteopontin protects against ischemic stroke

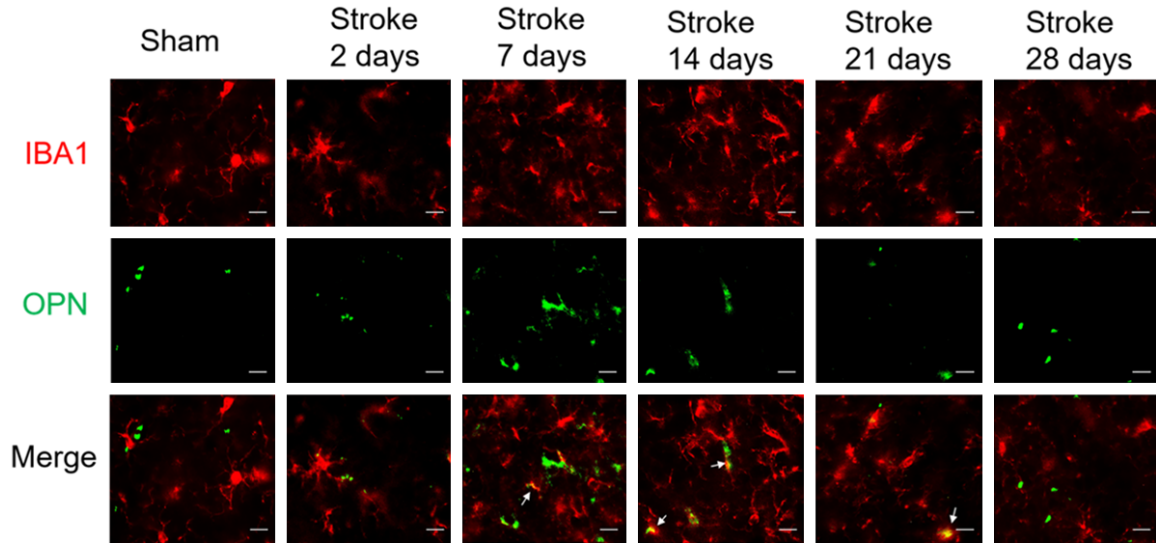

**Figure S1.** Co-staining for OPN (green) and IBA1 (red) in sham mice and the peri-infarct area of mice 2, 7, 14, 21, or 28 days post-stroke, n=6 per group. OPN was localized with IBA1 (microglia marker) (pointed by the white arrow). Original magnification, 40 $\times$ . Scale bar: 20  $\mu$ m.

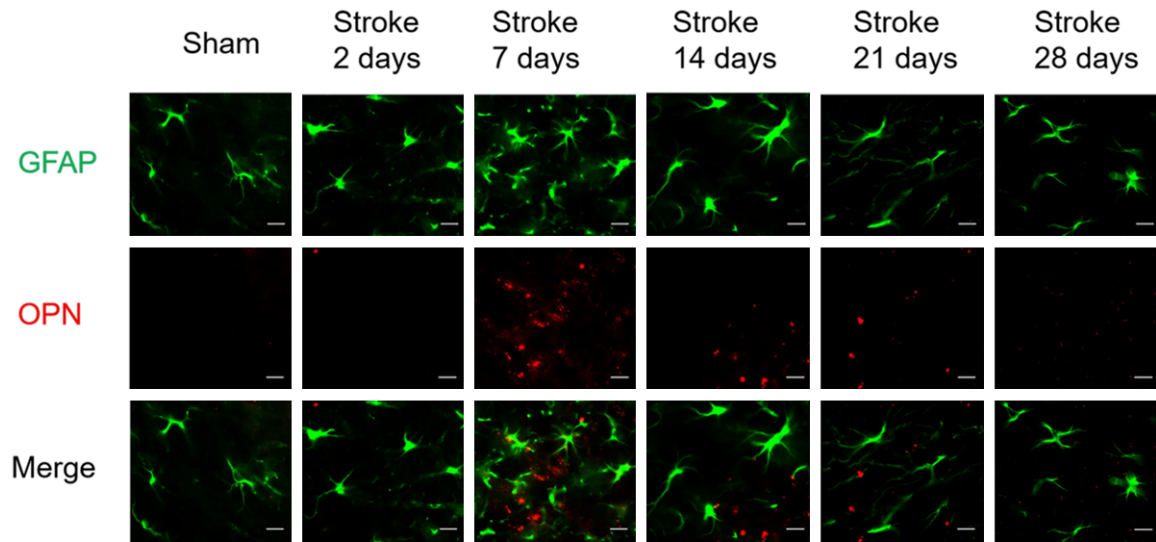

**Figure S2.** Co-staining for OPN (red) and GFAP (green) in sham mice and the peri-infarct area of mice 2, 7, 14, 21, or 28 days post-stroke, n=6 per group. OPN was not co-localized with GFAP. Original magnification, 40 $\times$ . Scale bar: 20  $\mu$ m.

# Osteopontin protects against ischemic stroke

## Ipsilateral hemisphere

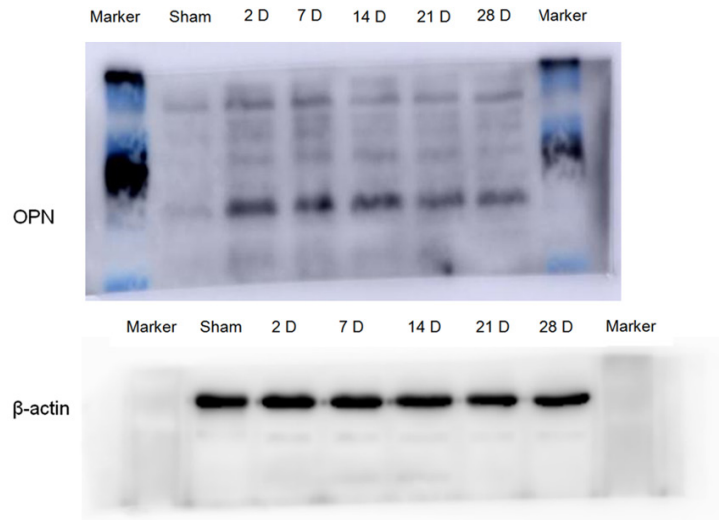

## Contralateral hemisphere

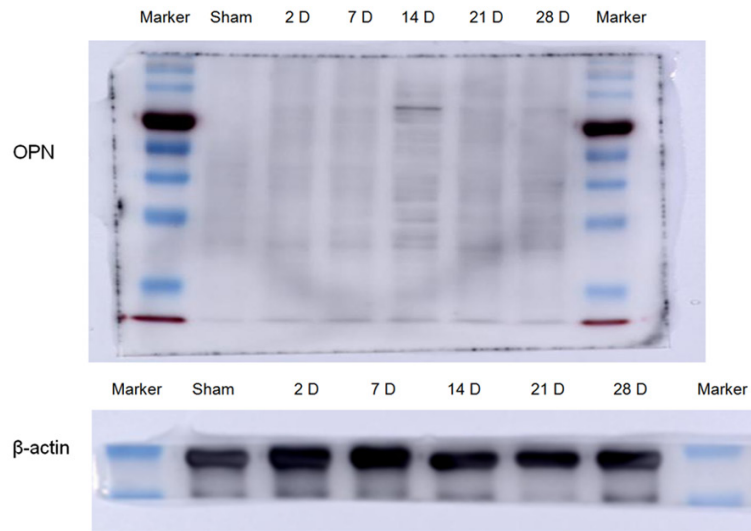

**Figure S3.** Additional original western images for relative levels of the OPN protein in the ipsilateral/contralateral hemisphere.

# Osteopontin protects against ischemic stroke

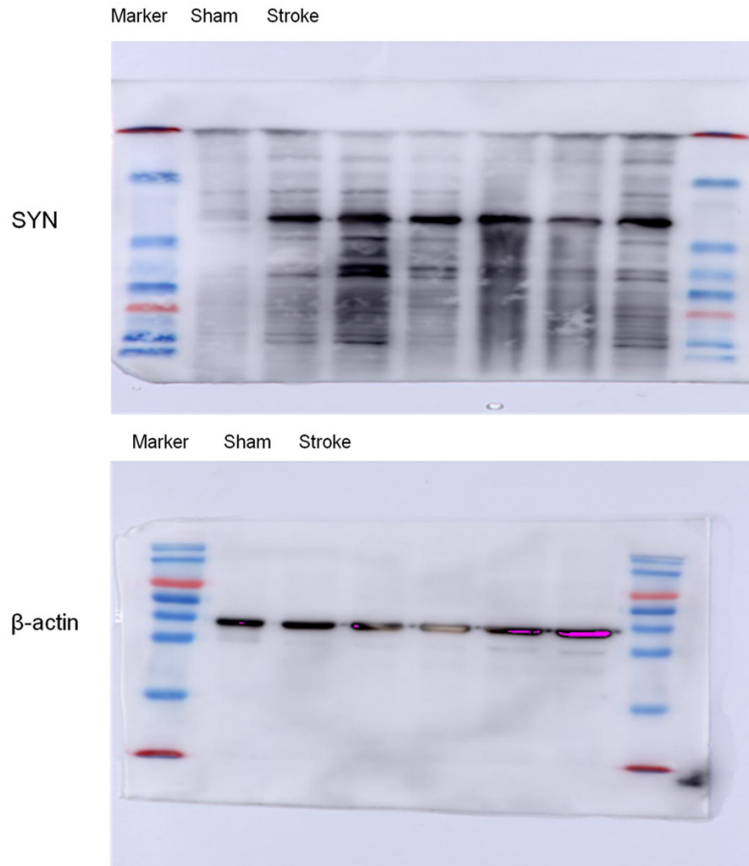

**Figure S4.** Additional original western images for relative levels of the SYN protein in the ipsilateral hemisphere.

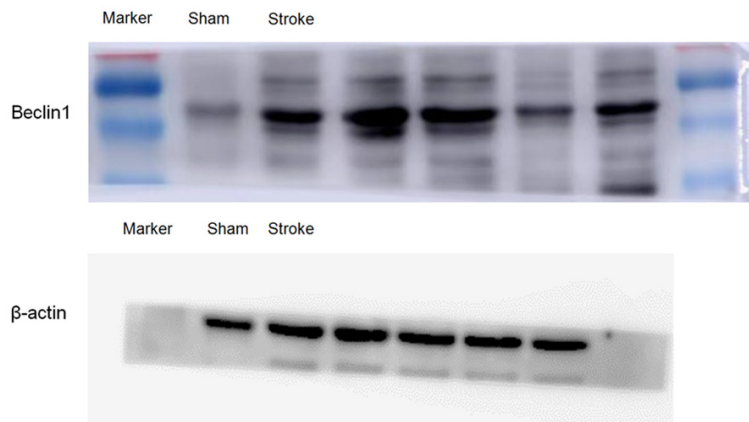

**Figure S5.** Additional original western images for relative levels of the beclin1 protein in the ipsilateral hemisphere.

## Osteopontin protects against ischemic stroke

**Table S1.** The statistical data of VgluT 1 puncta in each biological sample in Ipsilesional cortex for **Figure 5B**

|      | Sham   | Stroke+Saline | Stroke+rOPN |
|------|--------|---------------|-------------|
| N=1  | 4233   | 4756          | 7936        |
| N=2  | 2511   | 6952          | 7802        |
| N=3  | 2819   | 5893          | 7272        |
| N=4  | 3160   | 5742          | 8890        |
| N=5  | 2132   | 5021          | 7268        |
| Mean | 2971   | 5672.8        | 7833.6      |
| SEM  | 716.52 | 768.76        | 593.76      |

**Table S2.** The statistical data of VgluT 1 puncta in each biological sample in Contralesion cortex for **Figure 5B**

|      | Stroke+Saline | Stroke+rOPN |
|------|---------------|-------------|
| N=1  | 3857          | 7845        |
| N=2  | 3825          | 7632        |
| N=3  | 4532          | 7465        |
| N=4  | 3526          | 7941        |
| N=5  | 3632          | 6958        |
| Mean | 3874.4        | 7568.2      |
| SEM  | 350.81        | 347.18      |

# Osteopontin protects against ischemic stroke

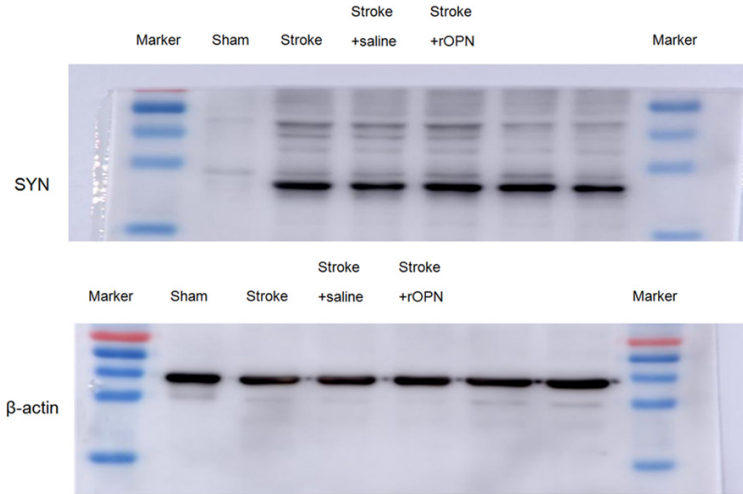

**Figure S6.** Additional original western images for relative levels of the SYN protein after OPN treatment.

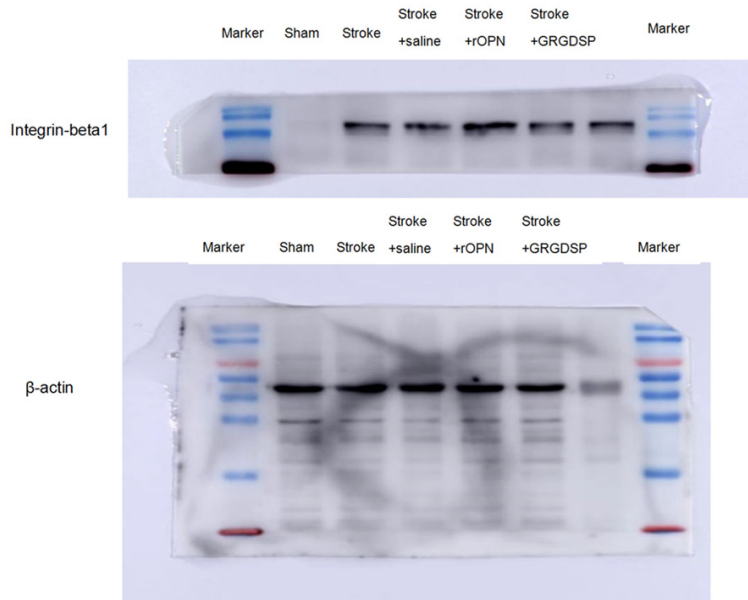

**Figure S7.** Additional original western images for relative levels of the integrin-  $\beta$ 1 protein after OPN and GRGDSP treatment.

# Osteopontin protects against ischemic stroke

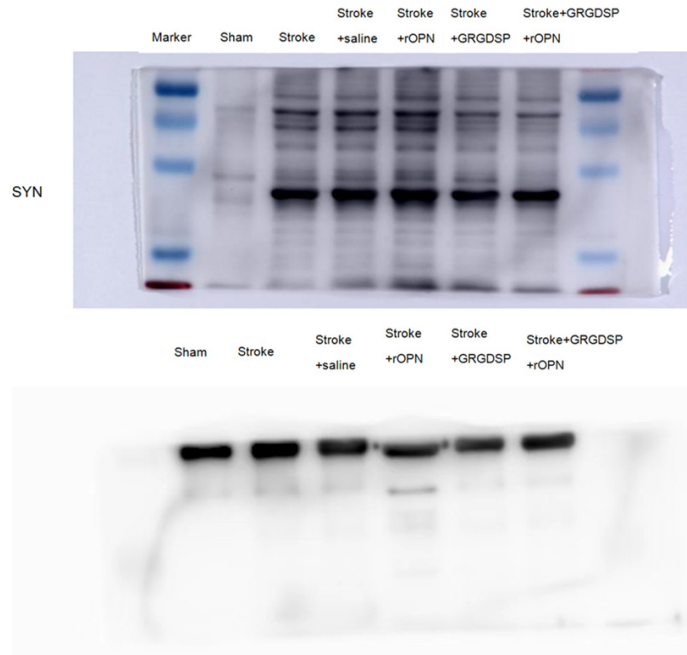

**Figure S8.** Additional original western images for relative levels of the SYN protein after OPN and GRGDSP treatment.

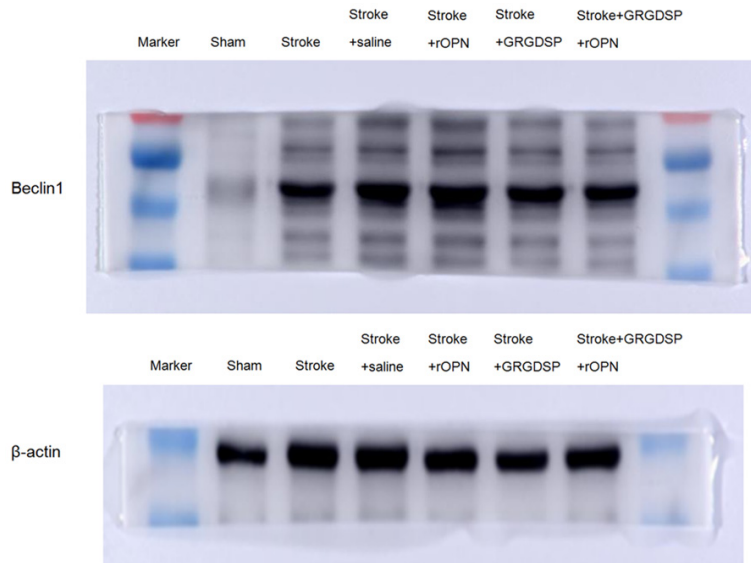

**Figure S9.** Additional original western images for relative levels of the beclin1 protein after OPN and GRGDSP treatment.
